# Supplementary material
Source: PubMed Central journal article supplement (PMC7170708)
Supplement: NIHMS1538541-supplement-Supplemental_Data_File___doc___tif__pdf__etc__.pdf [file NIHMS1538541-supplement-Supplemental_Data_File___doc___tif__pdf__etc__.pdf]

**Supplementary Table 1.** Generalized Linear Mixed Model

| Fixed Effects               | <i>Coef.</i> | <i>SE</i>  | <i>z</i>             | <i>p</i> |
|-----------------------------|--------------|------------|----------------------|----------|
| Intercept                   | 0.663        | 0.276      | -1.488               | 0.137    |
| Age                         | 0.992        | 0.016      | -0.477               | 0.634    |
| Male                        | 0.834        | 0.210      | -0.868               | 0.385    |
| Education                   | 0.961        | 0.029      | -1.392               | 0.164    |
| Adjusted-GDS                | 1.226        | 0.043      | 4.764                | 0.000    |
| Medication Count            | 1.005        | 0.022      | 0.211                | 0.833    |
| Hachinski                   | 1.200        | 0.084      | 2.182                | 0.029    |
| Enrolled to Have Evaluation | 1.194        | 0.287      | 0.617                | 0.538    |
| Family History Not Reported | 0.721        | 0.166      | -1.972               | 0.049    |
| Family History Unavailable  | 0.866        | 0.277      | -0.521               | 0.602    |
| Referral Source was PCP     | 1.696        | 0.300      | 1.760                | 0.078    |
| Digit Symbol                | 0.810        | 0.091      | -2.314               | 0.021    |
| DSBL Raw                    | 1.605        | 0.190      | 2.493                | 0.013    |
| LMD > -1SD                  | 0.462        | 0.223      | -3.459               | 0.001    |
| DSBL Raw × LMD > -1SD       | 0.679        | 0.206      | -1.875               | 0.061    |
| Random Effects              | <i>SD</i>    | <i>ICC</i> | <i>X<sup>2</sup></i> | <i>p</i> |
| NACC Site                   | 1.993        | 0.127      | 27.970               | 0.000    |

*Note* : Values for coefficients have been exponentiated from raw output; i.e., they can be read in the table as odds ratios. *DSBL* = Digit Span Backward Long. *GDS* = Geriatric Depression Scale; *LMD* = Logical Memory Delay. *ICC* = Intraclass correlation. *NACC* = National Alzheimer's Coordinating Center. *PCP* = Primary care provider.
